# Supplementary material for: A computational study on the amine-oxidation mechanism of monoamine oxidase: Insight into the polar nucleophilic mechanism
Source: Royal Society of Chemistry journal article supplement (doi:10.1039/b511350d), 2006-01-01
Supplement: b511350d.pdf [file b511350d.pdf]

## SUPPLEMENTARY MATERIAL

Table 11. Total energies, zero point vibrational energies, enthalpies and Gibbs free energies (kcal/mol) of the optimized structures for the polar nucleophilic reaction of p-X-benzylamines (X=H, OCH<sub>3</sub>, CF<sub>3</sub>, NO<sub>2</sub>, N(CH<sub>3</sub>)<sub>2</sub>, Cl, OH, Br, I, F) with flavin (t=10.9°), calculated from PM3 method.

Table 11A

| <b>p-H</b>                                                            | E       | ZPE     | E+ZPE   | E <sup>T</sup> | H <sup>T</sup> | G <sup>T</sup> |
|-----------------------------------------------------------------------|---------|---------|---------|----------------|----------------|----------------|
| Amine(S)                                                              | 19.821  | 90.169  | 109.991 | 114.272        | 114.836        | 90.266         |
| FAD(E)                                                                | -13.850 | 94.132  | 80.282  | 88.424         | 89.017         | 53.600         |
| Reactant complex                                                      | 0.859   | 187.738 | 188.597 | 200.764        | 201.329        | 155.249        |
| TS1                                                                   | 47.975  | 185.961 | 233.936 | 244.987        | 245.551        | 204.991        |
| Adduct                                                                | 33.551  | 189.983 | 223.534 | 234.838        | 235.403        | 194.181        |
| TS2                                                                   | 38.230  | 187.990 | 226.221 | 237.769        | 238.333        | 195.683        |
| FAD-                                                                  | -90.640 | 101.643 | 11.003  | 19.027         | 19.619         | -15.017        |
| Immonium(P)                                                           | 194.546 | 77.225  | 271.772 | 271.777        | 271.780        | 271.750        |
| E <sub>b</sub> (E <sub>RC</sub> -E <sub>E+S</sub> )                   | -5.112  | 3.437   | -1.676  | -1.931         | -2.524         | 11.383         |
| ΔE <sub>1</sub> <sup>*</sup> (E <sub>TS1</sub> -E <sub>E+S</sub> )    | 42.004  | 1.660   | 43.663  | 42.291         | 41.698         | 61.125         |
| ΔE <sub>2</sub> <sup>*</sup> (E <sub>TS2</sub> -E <sub>adduct</sub> ) | 4.679   | -1.993  | 2.687   | 2.931          | 2.930          | 1.502          |

Table 11B

| <b>p-OCH<sub>3</sub></b>                                              | E       | ZPE     | E+ZPE   | E <sup>T</sup> | H <sup>T</sup> | G <sup>T</sup> |
|-----------------------------------------------------------------------|---------|---------|---------|----------------|----------------|----------------|
| Amine(S)                                                              | -18.290 | 110.193 | 91.940  | 97.773         | 98.337         | 70.112         |
| FAD(E)                                                                | -13.850 | 94.132  | 80.282  | 88.424         | 89.017         | 53.600         |
| Reactant complex                                                      | -35.178 | 207.219 | 172.041 | 186.247        | 186.812        | 134.948        |
| TS1                                                                   | 10.328  | 205.937 | 216.265 | 228.938        | 229.502        | 184.890        |
| Adduct                                                                | -3.936  | 209.896 | 205.960 | 218.913        | 219.477        | 174.061        |
| TS2                                                                   | -0.466  | 208.147 | 207.681 | 220.768        | 221.332        | 174.941        |
| FAD-                                                                  | -90.640 | 101.643 | 11.003  | 19.027         | 19.619         | -15.017        |
| Immonium(P)                                                           | 152.257 | 97.323  | 249.581 | 249.586        | 249.588        | 249.557        |
| E <sub>b</sub> (E <sub>RC</sub> -E <sub>E+S</sub> )                   | -3.038  | 2.894   | -0.181  | 0.050          | -0.542         | 11.236         |
| ΔE <sub>1</sub> <sup>*</sup> (E <sub>TS1</sub> -E <sub>E+S</sub> )    | 42.468  | 1.612   | 44.043  | 42.742         | 42.148         | 61.178         |
| ΔE <sub>2</sub> <sup>*</sup> (E <sub>TS2</sub> -E <sub>adduct</sub> ) | 3.470   | -1.749  | 1.721   | 1.855          | 1.855          | 0.880          |

Table 11C

| <b>p-CF<sub>3</sub></b>                                 | E        | ZPE     | E+ZPE   | E <sup>T</sup> | H <sup>T</sup> | G <sup>T</sup> |
|---------------------------------------------------------|----------|---------|---------|----------------|----------------|----------------|
| Amine(S)                                                | -138.312 | 93.391  | -44.920 | -38.399        | -37.806        | -70.375        |
| FAD(E)                                                  | -13.850  | 94.132  | 80.282  | 88.424         | 89.017         | 53.600         |
| Reactant complex                                        | -154.466 | 191.537 | 37.071  | 51.883         | 52.447         | -2.295         |
| TS1                                                     | -110.824 | 190.468 | 79.644  | 92.798         | 93.363         | 46.530         |
| Adduct                                                  | -126.974 | 194.662 | 67.688  | 81.025         | 81.590         | 33.981         |
| TS2                                                     | -117.594 | 192.100 | 74.507  | 88.253         | 88.817         | 39.325         |
| FAD-                                                    | -90.640  | 101.643 | 11.003  | 19.027         | 19.619         | -15.017        |
| Immonium(P)                                             | 44.759   | 81.722  | 126.480 | 126.486        | 126.488        | 126.456        |
| E <sub>b</sub> (E <sub>RC</sub> -E <sub>E+S</sub> )     | -2.304   | 4.014   | 1.709   | 1.858          | 1.236          | 14.480         |
| $\Delta E_1^*$ (E <sub>TS1</sub> -E <sub>E+S</sub> )    | 41.338   | 2.945   | 44.282  | 42.773         | 42.152         | 63.305         |
| $\Delta E_2^*$ (E <sub>TS2</sub> -E <sub>adduct</sub> ) | 9.380    | -2.562  | 6.819   | 7.228          | 7.227          | 5.344          |

Table 11D

| <b>p-NO<sub>2</sub></b>                                 | E       | ZPE     | E+ZPE   | E <sup>T</sup> | H <sup>T</sup> | G <sup>T</sup> |
|---------------------------------------------------------|---------|---------|---------|----------------|----------------|----------------|
| Amine(S)                                                | 11.337  | 91.271  | 102.608 | 109.102        | 109.695        | 76.326         |
| FAD(E)                                                  | -13.850 | 94.132  | 80.282  | 88.424         | 89.017         | 53.600         |
| Reactant complex                                        | -6.207  | 189.750 | 183.543 | 197.631        | 198.195        | 146.721        |
| TS1                                                     | 38.192  | 188.394 | 226.586 | 239.158        | 239.722        | 194.827        |
| Adduct                                                  | 20.621  | 192.707 | 213.328 | 226.042        | 226.607        | 181.320        |
| TS2                                                     | 33.210  | 190.109 | 223.318 | 236.411        | 236.975        | 190.030        |
| FAD-                                                    | -90.640 | 101.643 | 11.003  | 19.027         | 19.619         | -15.017        |
| Immonium(P)                                             | 198.307 | 79.467  | 277.774 | 277.780        | 277.782        | 277.751        |
| E <sub>b</sub> (E <sub>RC</sub> -E <sub>E+S</sub> )     | -3.694  | 4.347   | 0.653   | 0.105          | -0.517         | 16.795         |
| $\Delta E_1^*$ (E <sub>TS1</sub> -E <sub>E+S</sub> )    | 40.705  | 2.991   | 43.696  | 41.632         | 41.010         | 64.901         |
| $\Delta E_2^*$ (E <sub>TS2</sub> -E <sub>adduct</sub> ) | 12.589  | -2.598  | 9.990   | 10.369         | 10.368         | 8.710          |

Table 11E

| <b>p-N(CH<sub>3</sub>)<sub>2</sub></b>                  | E       | ZPE     | E+ZPE   | E <sup>‡</sup> | H <sup>‡</sup> | G <sup>‡</sup> |
|---------------------------------------------------------|---------|---------|---------|----------------|----------------|----------------|
| Amine(S)                                                | 16.152  | 135.468 | 151.620 | 158.252        | 158.816        | 128.732        |
| FAD(E)                                                  | -13.850 | 94.132  | 80.282  | 88.424         | 89.017         | 53.600         |
| Reactant complex                                        | -4.165  | 233.375 | 229.211 | 243.625        | 244.189        | 193.459        |
| TS1                                                     | 44.786  | 231.156 | 275.942 | 289.421        | 289.986        | 243.565        |
| Adduct                                                  | 30.469  | 235.123 | 265.592 | 279.342        | 279.906        | 232.705        |
| TS2                                                     | 33.504  | 233.366 | 266.869 | 280.783        | 281.347        | 233.152        |
| FAD-                                                    | -90.640 | 101.643 | 11.003  | 19.027         | 19.619         | -15.017        |
| Immonium(P)                                             | 181.188 | 127.714 | 308.903 | 315.665        | 316.229        | 286.217        |
| E <sub>b</sub> (E <sub>RC</sub> -E <sub>E+S</sub> )     | -6.467  | -18.815 | -2.691  | -3.051         | -3.644         | 11.127         |
| $\Delta E_1^*$ (E <sub>TS1</sub> -E <sub>E+S</sub> )    | 42.484  | -21.034 | 44.040  | 42.745         | 42.153         | 61.223         |
| $\Delta E_2^*$ (E <sub>TS2</sub> -E <sub>adduct</sub> ) | 3.035   | -1.757  | 1.277   | 1.441          | 1.441          | 0.447          |

Table 11F

| <b>p-Cl</b>                                             | E       | ZPE     | E+ZPE   | E <sup>‡</sup> | H <sup>‡</sup> | G <sup>‡</sup> |
|---------------------------------------------------------|---------|---------|---------|----------------|----------------|----------------|
| Amine(S)                                                | 13.144  | 84.435  | 97.579  | 102.538        | 103.103        | 76.623         |
| FAD(E)                                                  | -13.850 | 94.132  | 80.282  | 88.424         | 89.017         | 53.600         |
| Reactant complex                                        | -3.623  | 181.418 | 177.795 | 191.750        | 191.687        | 141.939        |
| TS1                                                     | 41.247  | 180.197 | 221.144 | 233.214        | 233.778        | 191.224        |
| Adduct                                                  | 26.345  | 184.270 | 210.615 | 222.614        | 223.178        | 180.014        |
| TS2                                                     | 32.093  | 182.168 | 214.260 | 226.529        | 227.094        | 182.352        |
| FAD-                                                    | -90.640 | 101.643 | 11.003  | 19.027         | 19.619         | -15.017        |
| Immonium(P)                                             | 188.641 | 71.497  | 260.138 | 260.144        | 260.146        | 260.116        |
| E <sub>b</sub> (E <sub>RC</sub> -E <sub>E+S</sub> )     | -2.917  | 2.851   | -0.066  | 0.788          | -0.433         | 11.716         |
| $\Delta E_1^*$ (E <sub>TS1</sub> -E <sub>E+S</sub> )    | 41.953  | 1.630   | 43.283  | 42.252         | 41.658         | 61.001         |
| $\Delta E_2^*$ (E <sub>TS2</sub> -E <sub>adduct</sub> ) | 5.748   | -2.102  | 3.645   | 3.915          | 3.916          | 2.338          |

Table 11G

| <b>p-OH</b>                                             | E       | ZPE     | E+ZPE   | E <sup>T</sup> | H <sup>T</sup> | G <sup>T</sup> |
|---------------------------------------------------------|---------|---------|---------|----------------|----------------|----------------|
| Amine(S)                                                | -25.362 | 93.621  | 68.259  | 73.216         | 73.780         | 47.931         |
| FAD(E)                                                  | -13.850 | 94.132  | 80.282  | 88.424         | 89.017         | 53.600         |
| Reactant<br>complex                                     | -42.313 | 190.631 | 148.318 | 161.820        | 162.195        | 112.914        |
| TS1                                                     | 3.285   | 189.321 | 192.605 | 204.399        | 204.963        | 162.718        |
| Adduct                                                  | -11.018 | 193.264 | 182.245 | 194.324        | 194.888        | 151.883        |
| TS2                                                     | -7.399  | 191.561 | 184.162 | 196.365        | 196.929        | 152.781        |
| FAD-                                                    | -90.640 | 101.643 | 11.003  | 19.027         | 19.619         | -15.017        |
| Immonium(P)                                             | 146.002 | 80.893  | 226.895 | 226.901        | 226.903        | 226.873        |
| E <sub>b</sub> (E <sub>RC</sub> -E <sub>E+S</sub> )     | -3.101  | 2.878   | 0.223   | 0.180          | -0.602         | 11.383         |
| $\Delta E_1^*$ (E <sub>TS1</sub> -E <sub>E+S</sub> )    | 42.496  | 1.568   | 44.064  | 42.759         | 42.166         | 61.187         |
| $\Delta E_2^*$ (E <sub>TS2</sub> -E <sub>adduct</sub> ) | 3.619   | -1.703  | 1.917   | 2.041          | 2.041          | 0.898          |

Table 11H

| <b>p-Br</b>                                             | E       | ZPE     | E+ZPE   | E <sup>T</sup> | H <sup>T</sup> | G <sup>T</sup> |
|---------------------------------------------------------|---------|---------|---------|----------------|----------------|----------------|
| Amine(S)                                                | 27.592  | 84.199  | 111.791 | 116.903        | 117.467        | 90.127         |
| FAD(E)                                                  | -13.850 | 94.132  | 80.282  | 88.424         | 89.017         | 53.600         |
| Reactant<br>complex                                     | 10.800  | 181.712 | 191.972 | 205.463        | 206.027        | 155.262        |
| TS1                                                     | 55.621  | 179.954 | 235.575 | 247.509        | 248.074        | 204.702        |
| Adduct                                                  | 40.525  | 184.046 | 224.571 | 236.724        | 237.289        | 193.318        |
| TS2                                                     | 46.953  | 181.882 | 228.835 | 241.277        | 241.842        | 196.216        |
| FAD-                                                    | -90.640 | 101.643 | 11.003  | 19.027         | 19.619         | -15.017        |
| Immonium(P)                                             | 204.953 | 77.285  | 282.239 | 287.000        | 287.564        | 261.976        |
| E <sub>b</sub> (E <sub>RC</sub> -E <sub>E+S</sub> )     | -2.942  | -3.381  | -0.101  | 0.136          | -0.457         | 11.535         |
| $\Delta E_1^*$ (E <sub>TS1</sub> -E <sub>E+S</sub> )    | 41.879  | 1.623   | 43.502  | 42.182         | 41.590         | 60.975         |
| $\Delta E_2^*$ (E <sub>TS2</sub> -E <sub>adduct</sub> ) | 6.428   | -2.164  | 4.264   | 4.553          | 4.553          | 2.898          |

Table 11I

| <b>p-I</b>                                              | E       | ZPE     | E+ZPE   | E <sup>T</sup> | H <sup>T</sup> | G <sup>T</sup> |
|---------------------------------------------------------|---------|---------|---------|----------------|----------------|----------------|
| Amine(S)                                                | 41.254  | 84.499  | 125.753 | 130.819        | 131.383        | 103.837        |
| FAD(E)                                                  | -13.850 | 94.132  | 80.282  | 88.424         | 89.017         | 53.600         |
| Reactant<br>complex                                     | 24.500  | 181.465 | 205.966 | 219.410        | 219.975        | 169.139        |
| TS1                                                     | 69.334  | 180.236 | 249.570 | 261.470        | 262.035        | 218.418        |
| Adduct                                                  | 54.395  | 184.311 | 238.705 | 250.828        | 251.392        | 207.201        |
| TS2                                                     | 60.334  | 182.228 | 242.562 | 254.953        | 255.518        | 209.715        |
| FAD-                                                    | -90.640 | 101.643 | 11.003  | 19.027         | 19.619         | -15.017        |
| Immonium(P)                                             | 216.632 | 77.558  | 294.190 | 298.908        | 299.472        | 273.650        |
| E <sub>b</sub> (E <sub>RC</sub> -E <sub>E+S</sub> )     | -2.904  | 2.834   | -0.069  | 0.167          | -0.425         | 11.702         |
| $\Delta E_1^*$ (E <sub>TS1</sub> -E <sub>E+S</sub> )    | 41.930  | 1.605   | 43.535  | 45.227         | 41.635         | 60.981         |
| $\Delta E_2^*$ (E <sub>TS2</sub> -E <sub>adduct</sub> ) | 5.939   | -2.083  | 3.857   | 4.125          | 4.126          | 2.514          |

Table 11J

| <b>p-F</b>                                              | E        | ZPE     | E+ZPE   | E <sup>T</sup> | H <sup>T</sup> | G <sup>T</sup> |
|---------------------------------------------------------|----------|---------|---------|----------------|----------------|----------------|
| Amine(S)                                                | -23.705  | 85.963  | 62.258  | 66.947         | 67.512         | 41.917         |
| FAD(E)                                                  | -13.850  | 94.132  | 80.282  | 88.424         | 89.017         | 53.600         |
| Reactant<br>complex                                     | -40.555  | 182.959 | 142.404 | 155.450        | 156.015        | 107.306        |
| TS1                                                     | 4.589    | 181.723 | 186.312 | 197.806        | 198.370        | 156.623        |
| Adduct                                                  | -126.996 | 185.791 | 175.459 | 187.183        | 187.747        | 145.394        |
| TS2                                                     | -117.594 | 183.679 | 179.250 | 191.254        | 191.818        | 147.855        |
| FAD-                                                    | -90.640  | 101.643 | 11.003  | 19.027         | 19.619         | -15.017        |
| Immonium(P)                                             | 153.860  | 79.022  | 232.882 | 237.234        | 237.799        | 213.834        |
| E <sub>b</sub> (E <sub>RC</sub> -E <sub>E+S</sub> )     | -3.000   | 2.864   | -0.136  | 0.079          | -0.514         | 11.789         |
| $\Delta E_1^*$ (E <sub>TS1</sub> -E <sub>E+S</sub> )    | 42.144   | 1.628   | 43.772  | 42.435         | 41.841         | 61.106         |
| $\Delta E_2^*$ (E <sub>TS2</sub> -E <sub>adduct</sub> ) | 9.402    | -2.112  | -3.791  | -4.071         | 4.071          | 2.461          |
